# Supplementary material for: Physical activity reduces the risk of incident type 2 diabetes in general and in abdominally lean and obese men and women: the EPIC–InterAct Study
Source: Springer Nature journal article supplement (doi:10.1007/s00125-012-2532-2), 2012-04-20
Supplement: MOESM1 [file 8090792]

## ELECTRONIC SUPPLEMENTARY MATERIAL

**Supplementary Table 1.** Combined effects (Hazard Ratios; 95% CI) of overall physical activity and BMI on incident diabetes in men and women (Normal-weight and Active as the reference group).

|                                            | <u>Active</u><br>(n=2,645) | <u>Moderately Active</u><br>(n=2,794) | <u>Moderately Inactive</u><br>(n=3,660) | <u>Inactive</u><br>(n=2,600) |
|--------------------------------------------|----------------------------|---------------------------------------|-----------------------------------------|------------------------------|
| <b>Men</b>                                 |                            |                                       |                                         |                              |
| Normal weight (BMI<25 kg/m <sup>2</sup> )  | 1.00                       | 0.80 (0.61-1.06)                      | 1.20 (0.94-1.55)                        | 1.69 (1.28-2.22)             |
| Over-weight (BMI 25-30 kg/m <sup>2</sup> ) | 1.58 (1.23-2.02)           | 1.77 (1.38-2.27)                      | 1.86 (1.46-2.37)                        | 2.27 (1.76-2.93)             |
| Obese (BMI>30 kg/m <sup>2</sup> )          | 1.73 (1.19-2.52)           | 1.91 (1.32-2.76)                      | 2.52 (1.77-3.60)                        | 2.37 (1.65-3.40)             |
|                                            | <u>Active</u><br>(n=2,458) | <u>Moderately Active</u><br>(n=3,134) | <u>Moderately Inactive</u><br>(n=5,428) | <u>Inactive</u><br>(n=4,675) |
| <b>Women</b>                               |                            |                                       |                                         |                              |
| Normal weight (BMI<25 kg/m <sup>2</sup> )  | 1.00                       | 1.04 (0.83-1.30)                      | 1.08 (0.87-1.33)                        | 1.43 (1.14-1.80)             |
| Over-weight (BMI 25-30 kg/m <sup>2</sup> ) | 2.15 (1.69-2.73)           | 2.55 (2.02-3.23)                      | 2.49 (2.00-3.10)                        | 2.90 (2.30-3.64)             |
| Obese (BMI>30 kg/m <sup>2</sup> )          | 3.57 (2.54-5.03)           | 4.16 (2.96-5.85)                      | 3.97 (2.89-5.45)                        | 4.21 (3.09-5.74)             |

Models are adjusted for study location education (no/primary/technical/other secondary, professional), smoking status (never/former/current), alcohol consumption (g/day), energy intake (kcal/day) and baseline BMI.
