# Supplementary material for: Physical activity reduces the risk of incident type 2 diabetes in general and in abdominally lean and obese men and women: the EPIC–InterAct Study
Source: Springer Nature journal article supplement (doi:10.1007/s00125-012-2532-2), 2012-04-20
Supplement: MOESM2 [file 125_2012_2532_MOESM2_ESM.pdf]

**Supplementary Table 2.** Joint effects (Hazard Ratios; 95% CI) of overall physical activity and central obesity (waist circumference) with incident diabetes in men and women (Abdominally lean and Active as the reference group).

|                              | <u>Active</u><br>(n=2,511) | <u>Moderately Active</u><br>(n=2,524) | <u>Moderately Inactive</u><br>(n=3,449) | <u>Inactive</u><br>(n=2,261) |
|------------------------------|----------------------------|---------------------------------------|-----------------------------------------|------------------------------|
| <b>Men</b>                   |                            |                                       |                                         |                              |
| Waist circumference (<94 cm) | 1.00                       | 1.09 (0.88-1.36)                      | 1.19 (0.97-1.47)                        | 1.45 (1.14-1.85)             |
| Waist circumference (≥94 cm) | 1.44 (1.16-1.80)           | 1.54 (1.24-1.92)                      | 1.77 (1.43-2.19)                        | 1.85 (1.48-2.33)             |
|                              | <u>Active</u><br>(n=2,294) | <u>Moderately Active</u><br>(n=2,890) | <u>Moderately Inactive</u><br>(n=5,204) | <u>Inactive</u><br>(n=4,429) |
| <b>Women</b>                 |                            |                                       |                                         |                              |
| Waist circumference (<80 cm) | 1.00                       | 0.98 (0.76-1.26)                      | 1.13 (0.90-1.42)                        | 1.36 (1.06-1.75)             |
| Waist circumference (≥80 cm) | 1.95 (1.51-2.50)           | 2.28 (1.78-2.91)                      | 2.10 (1.67-2.65)                        | 2.35 (1.84-2.99)             |

Models are adjusted for study centre, education (no/primary/technical/other secondary, professional), smoking status (never/former/current), alcohol consumption (g/day) energy intake (kcal/day) and baseline waist circumference.
